# Supplementary material for: A novel fluorometric assay for trypsin on the basis of a gemini anionic surfactant/BSA/NR supramolecular assembly system with favorable salt resistance
Source: Royal Society of Chemistry journal article supplement (doi:10.1039/c9ay01345h), 2019-01-01
Supplement: c9ay01345h1.pdf [file c9ay01345h1.pdf]

## Electronic Supplementary Information

### A novel fluorometric assay for trypsin on the basis of gemini anionic surfactant/BSA/NR supramolecular assembly system with favorable salt resistance

Lan Jia<sup>\*a</sup>, YuFang Yang<sup>b</sup>, Xiang Liu<sup>a</sup>, Song Chen<sup>\*a</sup>, JingXin Zhu<sup>a</sup>

<sup>a</sup>Key Laboratory of Interface Science and Engineering in Advanced Materials, Ministry of Education, College of Material Science and Engineering, Taiyuan University of Technology, Taiyuan, 030001, P. R. China

<sup>b</sup>Shanxi Agricultural Planning Design and Research Institute, Taiyuan, 030001, P. R. China

\*Corresponding author.

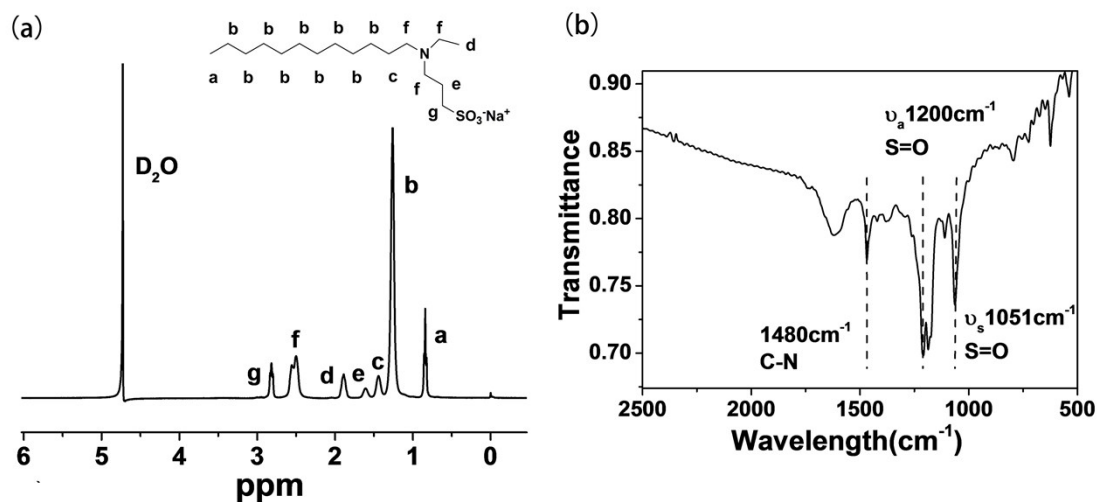

Fig. S1 (a) <sup>1</sup>H NMR spectrum and (b) FT-IR spectrum of C<sub>3</sub>C<sub>12</sub>C<sub>3</sub>(SO<sub>3</sub>)<sub>2</sub>

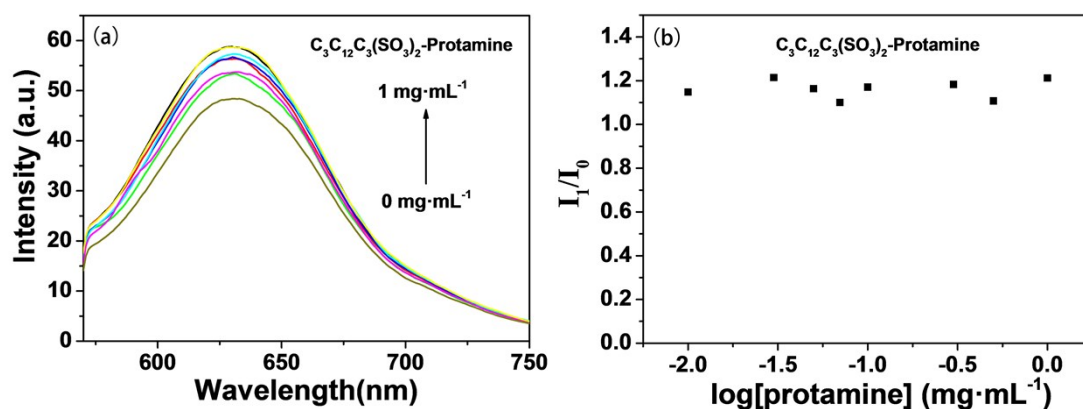

Fig. S2 (a) Fluorescence emission spectra of C<sub>3</sub>C<sub>12</sub>C<sub>3</sub>(SO<sub>3</sub>)<sub>2</sub>-protamine solutions with different concentration of protamine; (b) Plot of the I<sub>1</sub>/I<sub>0</sub> as a function of logarithm concentrations of protamine in C<sub>3</sub>C<sub>12</sub>C<sub>3</sub>(SO<sub>3</sub>)<sub>2</sub>-protamine solutions.

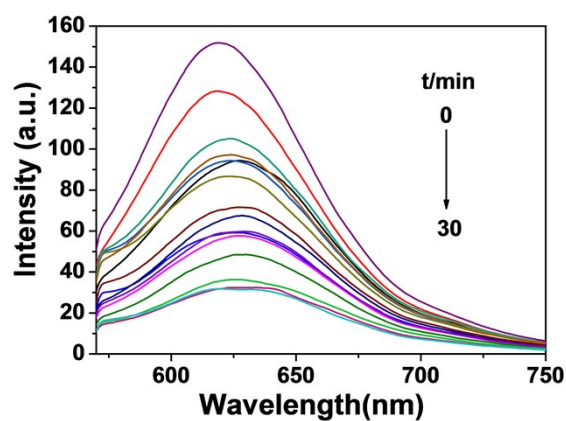

**Fig. S3** Time-dependent fluorescence quenching of  $C_3C_{12}C_3(SO_3)_2/BSA /NR$  assemblies in the presence of trypsin ( $0.05 \text{ mg mL}^{-1}$ ).

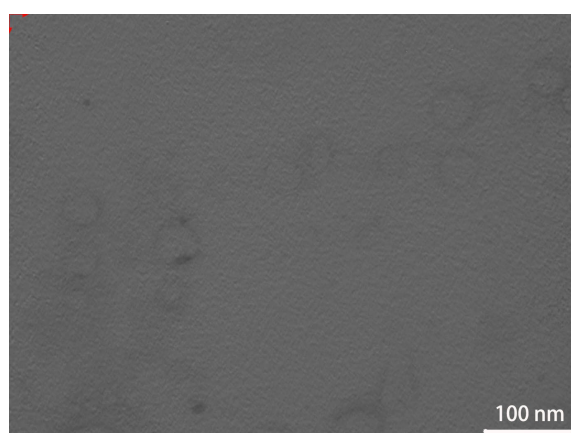

**Fig. S4** TEM image of  $C_3C_{12}C_3(SO_3)_2/BSA /NR$  assemblies with  $0.1 \text{ mg}\cdot\text{mL}^{-1}$  trypsin.

**Table S1** A comparison of different methods for trypsin determination

| Materials             | Methods          | Linear range                                                                   | LODs                                   | Ref.      |
|-----------------------|------------------|--------------------------------------------------------------------------------|----------------------------------------|-----------|
| Electrochemical probe | Electro-chemical | $0.005\text{--}0.15 \mu\text{g}\cdot\text{mL}^{-1}$                            | $1.8 \text{ ng}\cdot\text{mL}^{-1}$    | 8         |
| Ag NPs                | Colorimetric     | $2.5\text{--}200 \text{ ng mL}^{-1}$                                           | $2 \text{ ng}\cdot\text{mL}^{-1}$      | 34        |
| Au nanoclusters       | Colorimetric     | $0.9 \mu\text{g}\cdot\text{mL}^{-1}\text{--}1.0 \text{ mg}\cdot\text{mL}^{-1}$ | $0.6 \mu\text{g}\cdot\text{mL}^{-1}$   | 35        |
| Ag nanoclusters       | Fluorimetric     | $0.0\text{--}50.0 \text{ n}\cdot\text{mL}^{-1}$                                | $1 \text{ ng}\cdot\text{mL}^{-1}$      | 36        |
| Au nanoclusters       | Fluorimetric     | $0.01\text{--}2 \mu\text{g}\cdot\text{mL}^{-1}$                                | $0.004 \mu\text{g}\cdot\text{mL}^{-1}$ | 37        |
| Fluorescent probe     | Fluorimetric     | $0\text{--}0.4 \mu\text{g mL}^{-1}$                                            | $0.0282 \text{ ng mL}^{-1}$            | 38        |
| Cu nanoclusters       | Fluorimetric     | $2\text{--}20 \text{ ng}\cdot\text{mL}^{-1}$                                   | $2 \text{ ng}\cdot\text{mL}^{-1}$      | 39        |
| Carbon dots           | Fluorimetric     | $2.5\text{--}80 \text{ ng mL}^{-1}$                                            | $0.84 \text{ ng}\cdot\text{mL}^{-1}$   | 40        |
| Au nanoclusters       | Fluorimetric     | $0.2\text{--}100 \mu\text{g mL}^{-1}$                                          | $0.08 \mu\text{g mL}^{-1}$             | 41        |
| Nile red              | Fluorimetric     | $1.6 - 150 \text{ ng mL}^{-1}$                                                 | $1.6 \text{ ng}\cdot\text{mL}^{-1}$    | This work |

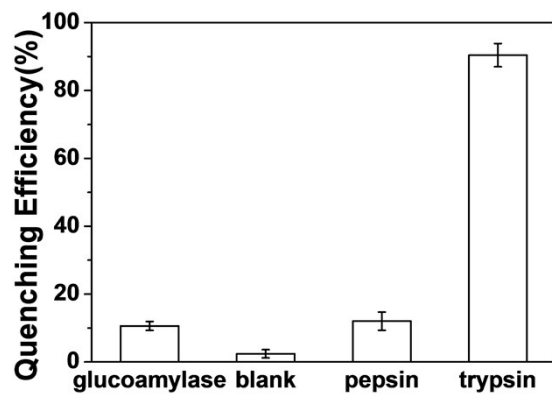

**Fig. S5** Quenching efficiency of  $C_3C_{12}C_3(SO_3)_2/BSA/NR$  solutions at 630 nm with different proteins. The concentration of each protein was  $0.1 \text{ mg} \cdot \text{mL}^{-1}$ .

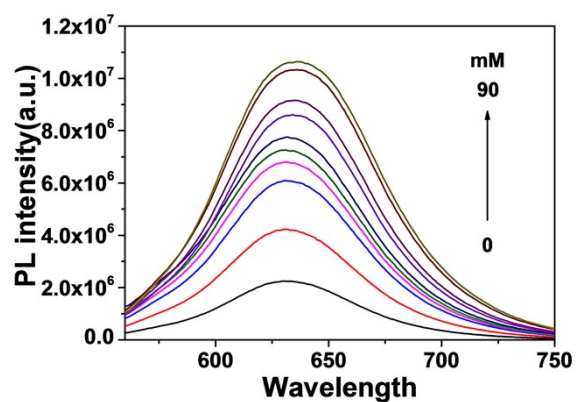

**Fig. S6** Fluorescence emission spectra of SDS/protamine/NR solutions with trypsin ( $0.1 \text{ mg} \cdot \text{mL}^{-1}$ ) at different NaCl concentrations.
